# Supplementary material for: Highly fluorescent cucurbit[8]uril–perylenemonoimide host–guest complexes as efficient fluorescent probes for N-terminal phenylalanine
Source: Royal Society of Chemistry journal article supplement (doi:10.1039/c6ra18012d), 2016-01-01
Supplement: c6ra18012d1.pdf [file c6ra18012d1.pdf]

## Supporting Information

# Highly Fluorescent Cucurbit[8]uril-Perylenemonoimide Host-Guest Complexes As Efficient Fluorescent Probes for N-Terminal Phenylalanine

Gyan H. Aryal,<sup>a</sup> Liming Huang,<sup>a\*</sup> and Kenneth W. Hunter<sup>a\*</sup>

Department of Microbiology and Immunology, School of Medicine, University of Nevada, Reno, NV 89557, USA

## Table of Contents

|                                                                                                    |      |
|----------------------------------------------------------------------------------------------------|------|
| 1. Experimental Section .....                                                                      | S3   |
| 1.1. General Methods .....                                                                         | 3    |
| 1.2. Synthesis Overview.....                                                                       | 4    |
| 1.3. Synthetic Procedure and Characterization .....                                                | 4-5  |
| 1.4. NMR and Mass spectra.....                                                                     | 6-8  |
| 1.5 UV-vis spectra, fluorescence spectra, fluorescence titration, fluorescence decay, and NMR..... | 9-19 |
| 1.6. References .....                                                                              | 19   |

## 1. Experimental Section

### 1.1. General methods

Unless otherwise stated, all solvents and chemicals were purchased from Sigma Aldrich and used without further purification. Cucurbit[7]uril and Cucurbit[8]uril were purchased from Strem Chemicals Inc. (Newburyport, MA) and dried at 110 °C for 24 hours before use. Amino acids: Glycine, Phenylalanine, Tyrosine and Tryptophan were purchased from Sigma Aldrich. Peptides: Phe-Gly-Gly was purchased from Sigma Aldrich and Gly-Phe-Gly, Gly-Gly-Phe were obtained from Chem-Impex International, Inc. <sup>1</sup>H- and <sup>13</sup>C-NMR spectra were recorded on either a Varian 400 or 500 MHz spectrometer in CDCl<sub>3</sub>, DMSO-d<sub>6</sub>, CF<sub>3</sub>COOD, or D<sub>2</sub>O. MALDI-TOF spectra were recorded on a Bruker Autoflex3 Matrix Assisted Laser Desorption Ionization-Time of Flight Mass Spectrometer (MALDI-TOF MS).

UV-vis spectra were recorded with a dual-beam Perkin Elmer Lambda 950 Spectrophotometer using UV-WIN Lab version 5.1.5 software. Fluorescence spectra were acquired using a Jobin - Yvon Horiba Fluorolog 3-222 Fluorescence Spectrophotometer. 1-cm or 0.5-cm quartz cuvettes were used for both UV-vis and fluorescence studies. The binding constant of CB[8]:**PMI-1** as determined by fluorescence titration was calculated using a 1:1 binding model in the Origin 9.1 program.<sup>1</sup>

Quantum yields were determined using another water-soluble perylene monoimide as a standard (QY=0.50 in methanol).<sup>2</sup>

Lifetime measurements were performed at 25°C using a Fluorolog-3 Fluorometer equipped with a NanoLED-492, FluoroHub TCSPC, a single photon detection cooled photocathode TBX-05, and DataStation DAS6 Foundation Software. All studies were performed without purging the solutions with inert gas to remove oxygen.

## 1.2 Synthesis Overview

### 1.2.1. Synthesis of PMI-1

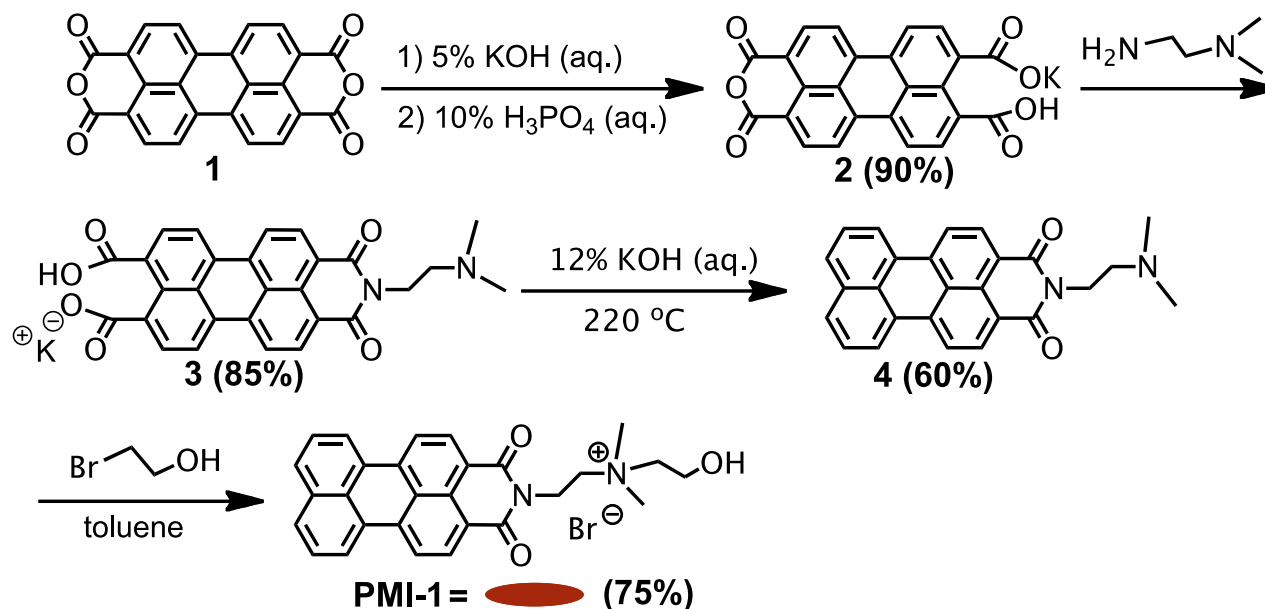

Figure S1: Synthesis of PMI-1.

## 1.3. Synthetic Procedures and Characterization

### Synthesis of 3

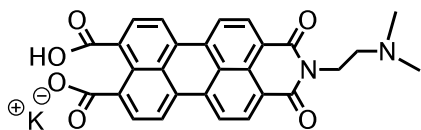

A mixture of monopotassium salt **2** (It was synthesized using a previous reported procedure without further characterization.<sup>3</sup>) (5.00 g, 11.0 mmol) and *N,N*-Dimethylethylenediamine (3.93g, 44.0 mmol) was dissolved in 200 mL water. The mixture was stirred at room temperature for 4 hours. Acetone (800 mL) was added to induce precipitation and the resulting red solid was filtered and dried under vacuum at 80 °C to give (4.84 g, 9.0 mmole, 85% yield) of **3**. <sup>1</sup>H NMR (400 MHz, CF<sub>3</sub>COOD, 25 °C) δ 8.84-8.52 (m, 8H), 4.95 (br, 2H), 4.02 (br, 2H), 3.42 (s, 6H) ppm.

## Synthesis of 4

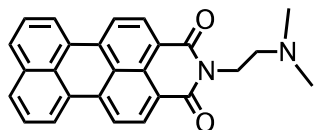

Compound **3** (2.00 g, 3.8 mmol) and KOH (1.90 g, 34.0 mmol) were dissolved in 40 mL water in a Teflon cup. The Teflon cup was placed in a stainless-steel reaction vessel with a lead<sup>208</sup>. The closed reaction vessel was heated in a sand bath at 220 °C for 12 hours. The reaction vessel was cooled to room temperature and the resulting solid was collected and washed with excess water using centrifugation. A dark-red solid was dried under vacuum at 110 °C. The resulting crude product was dissolved in chloroform and purified using an alumina column to yield **3** (0.89 g, 2.3 mmol, 60%) **4**. <sup>1</sup>H NMR (Varian 400 MHz, CDCl<sub>3</sub>) δ 8.39 (d, *J* = 6.8 Hz, 2H), 8.24 (d, *J* = 6 Hz, 2H), 8.17 (d, *J* = 6.4 Hz, 2H), 7.82 (d, *J* = 6.4 Hz, 2H), 7.54 (t, *J* = 6.4 Hz, 2H), 4.36 (t, *J* = 5.6 Hz, 2H), 2.76 (t, *J* = 4 Hz, 2H), 2.46 (s, 6H); <sup>13</sup>C NMR (100 MHz, DMSO-*d*<sub>6</sub>) δ 167.8, 138.5, 135.6, 131.7, 128.6, 126.9, 124.2, 63.9, 62.3, 53.1, 37.1, 9.6; ESI<sup>+</sup>: *m/z* = 393.34 [M+H]<sup>+</sup> (calc'd. 393.16 for C<sub>26</sub>H<sub>21</sub>N<sub>2</sub>O<sub>2</sub>).

## Synthesis of PMI-1

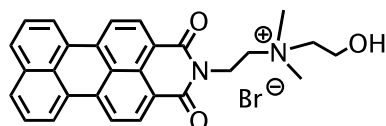

In a round bottom flask, compound **4** (100 mg, 0.25 mmol) in toluene (5 mL) was added to ethyl 1-bromoethanol (0.5g, 0.004 mole). The resulting mixture was stirred at room 110 °C for 48 hrs. The reaction mixture was precipitated out with ethyl acetate and collected using a centrifuge. The resulting product was dissolved in water and filtered using a fine porosity fritted glass filter. The filtrate was collected and dried under vacuum. (97 mg, 0.18 mmol, 75%). <sup>1</sup>H NMR (Varian 400 MHz, DMSO-*d*<sub>6</sub>) δ 8.65-8.63 (m, 4H), 8.42 (t, *J* = 6 Hz, 2H), 8.07 (d, *J* = 6.4 Hz, 2H), 7.71 (t, *J* = 6 Hz, 2H), 5.35 (t, *J* = 3.6 Hz, 2H), 4.48 (t, *J* = 5.6 Hz, 2H), 3.93 (br, 2H), 3.68 (t, *J* = 6.8 Hz, 6H), 3.59 (t, *J* = 4.8 Hz, 2H), 3.31 (s, 3H); <sup>13</sup>C NMR (100 MHz, CF<sub>3</sub> COOD) δ 167.8, 138.5, 135.6, 131.7, 128.6, 126.9, 124.2, 63.9, 62.3, 53.1, 37.1, 9.6; MALDI-TOF: *m/z* = 437.20 [M+H]<sup>+</sup> (calc'd. 437.19 for C<sub>28</sub>H<sub>25</sub>N<sub>2</sub>O<sub>3</sub>).

## 1.4. NMR and Mass spectra

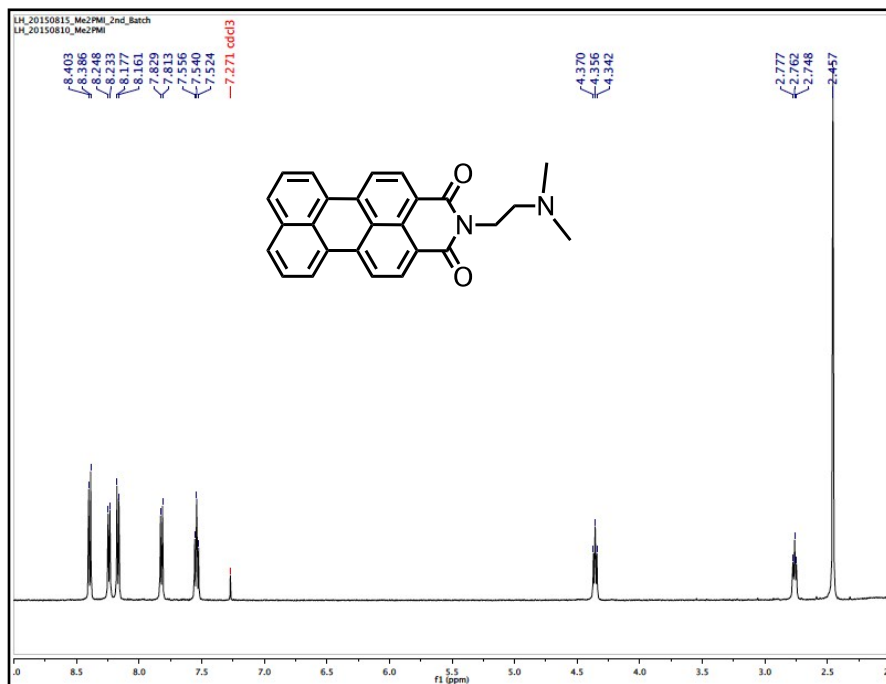

Figure S2. <sup>1</sup>H NMR of 4 in CDCl<sub>3</sub>.

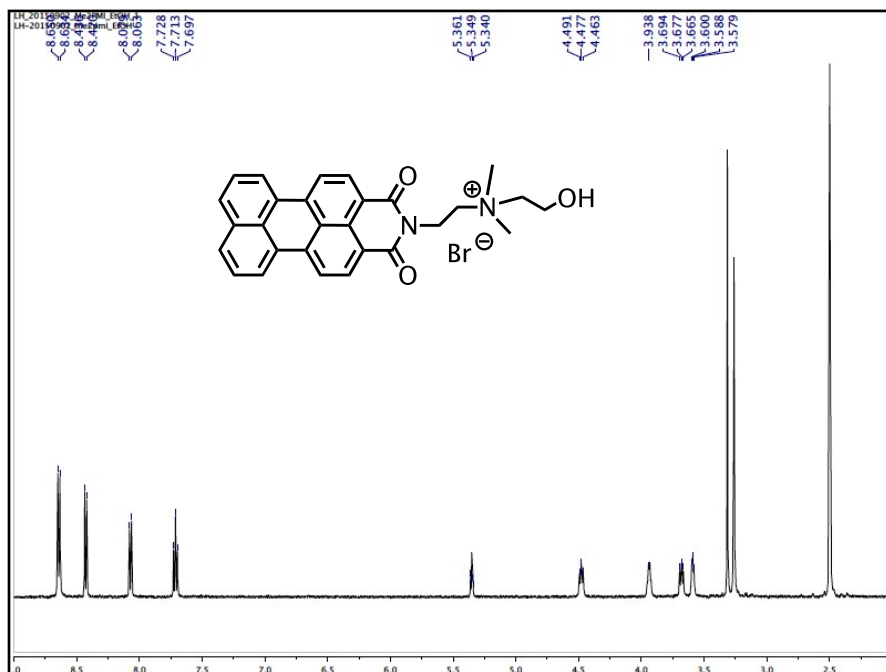

Figure S3. <sup>1</sup>H NMR of PMI-1 in DMSO-d<sub>6</sub>.

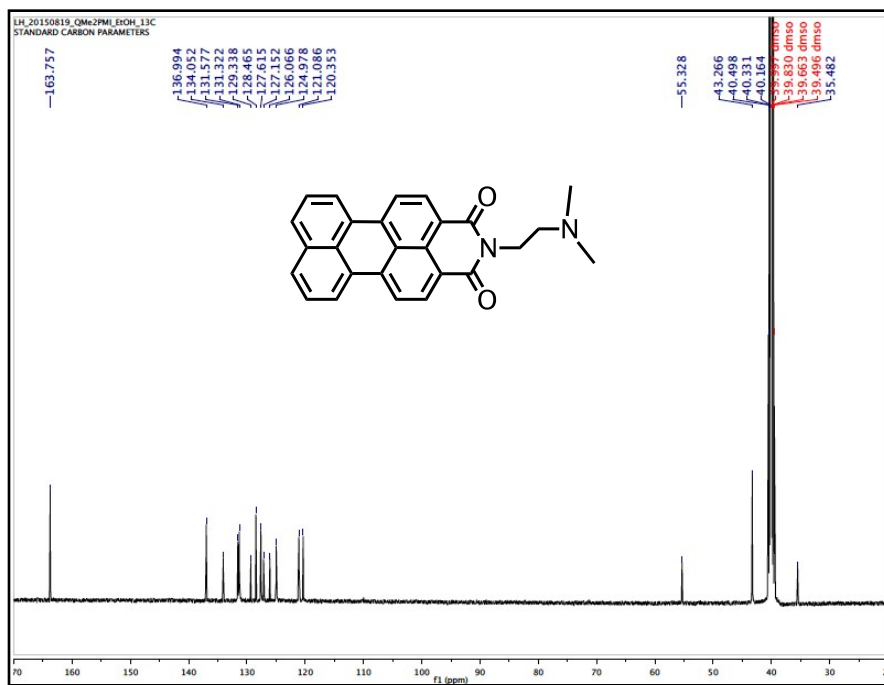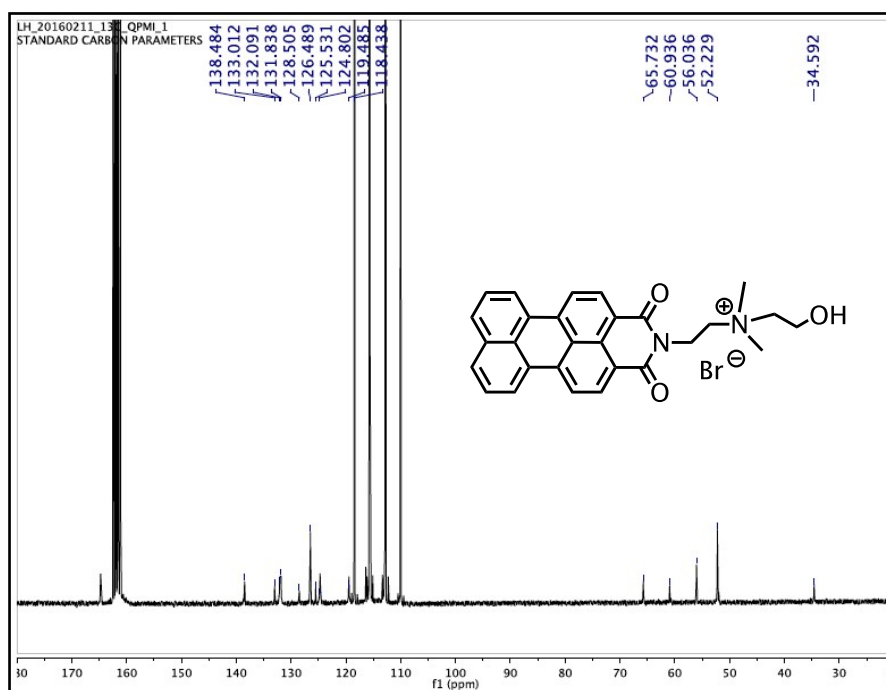

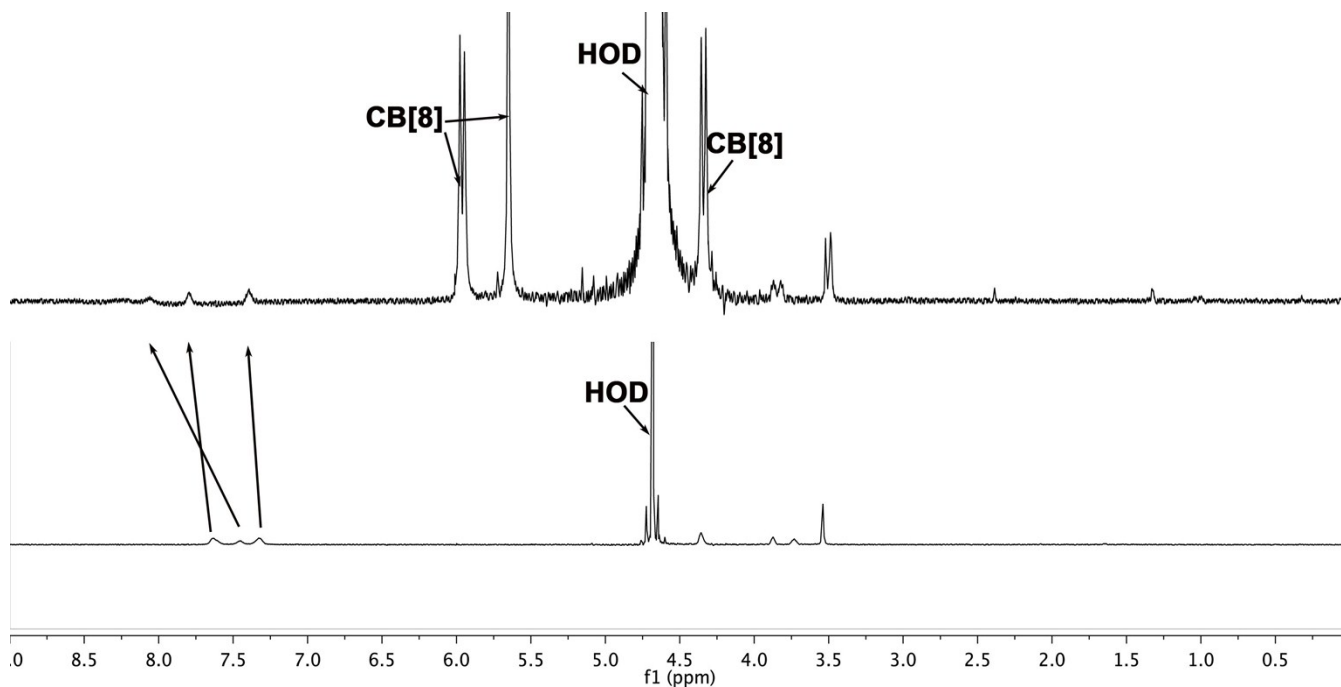

**Figure S6.** <sup>1</sup>H-NMR of PMI-1 (0.1 mM) (bottom) and CB[8]-PMI-1 (0.5 mM) (top) at 50 °C.

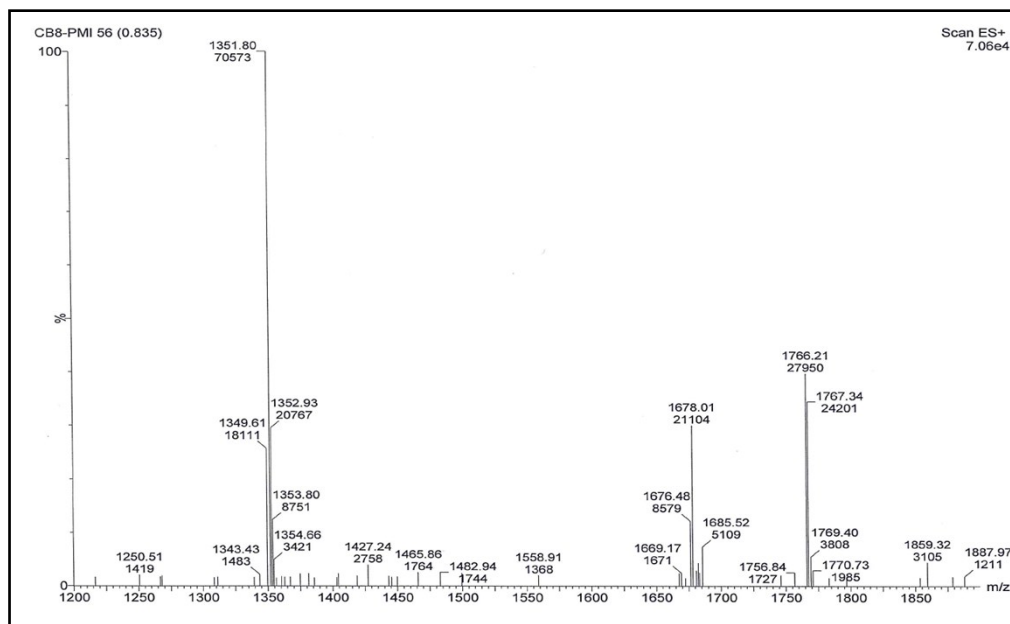

**Figure S7.** ESI mass of CB[8]:PMI-1 in H<sub>2</sub>O with 10% (v/v) MeOH. (The observed mass is 1766.21 that is equal to the calculated value.)



## 1.6 UV-vis spectra, fluorescence spectra, fluorescence titration, and fluorescence decay

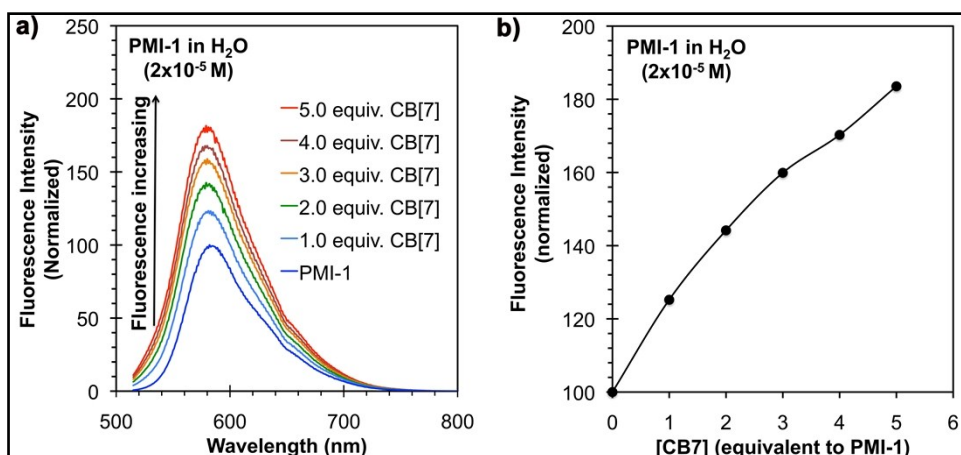

**Figure S8.** (left) Fluorescence emission spectra and (right) titration curve (Fluorescence intensity vs. the concentration of CB[7]) of **PMI-1** ( $2.0 \times 10^{-5} \text{ M}$ ) in water after the addition of 0, 1.0, 2.0, 3.0, 4.0, 5.0 equivalents of CB[7]. Fluorescence emission spectra were collected when samples were excited at 490 nm.

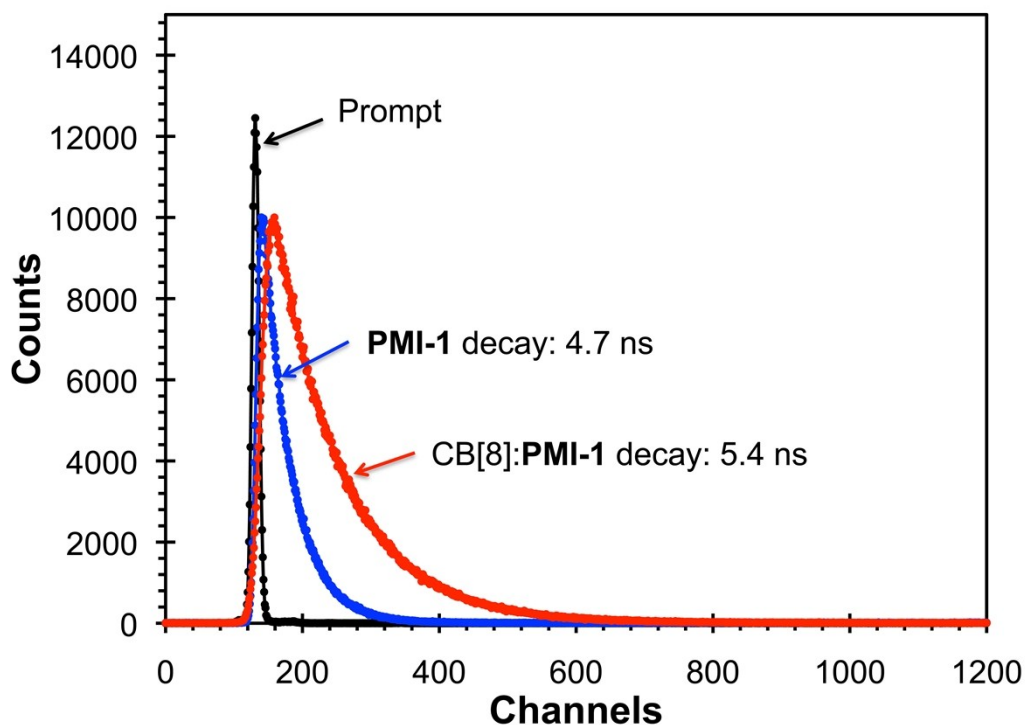

**Figure S9.** Fluorescence decay of **PMI-1** ( $2.0 \times 10^{-5} \text{ M}$ ) and **CB[8]:PMI-1** in Water.

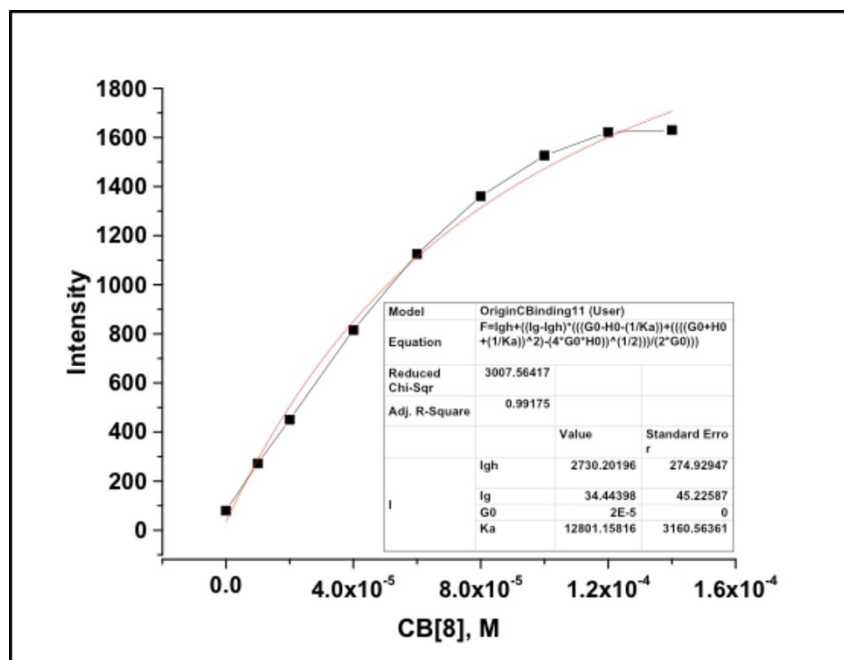

**Figure S10.** Fluorescence titration experiment for the binding of **PMI-1** to CB[8] at 0, 1, 2, 40, 60, 80, 100, 120, and 140  $\mu$ M. The fluorescence intensity at 570 nm were plotted against the concentration CB[8]. The red line represents the best fits of the data to a 1:1 binding.

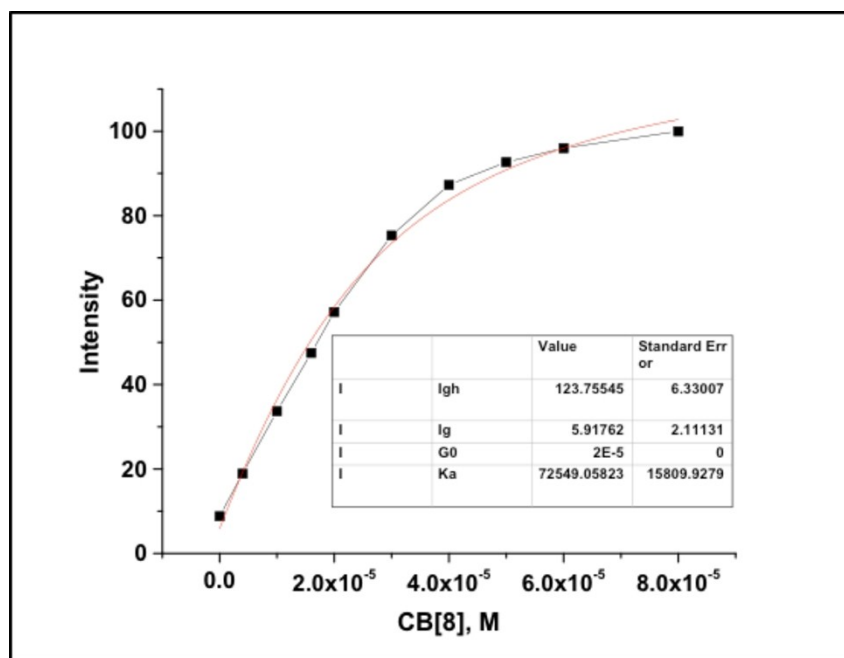

**Figure S11.** Fluorescence titration experiment for the binding of **PDI-1** to CB[8] at 0, 1, 2, 40, 60, and 80  $\mu$ M. The fluorescence intensity at 570 nm was plotted against the concentration CB[8]. The red line represents the best fits of the data to a 1:1 binding.

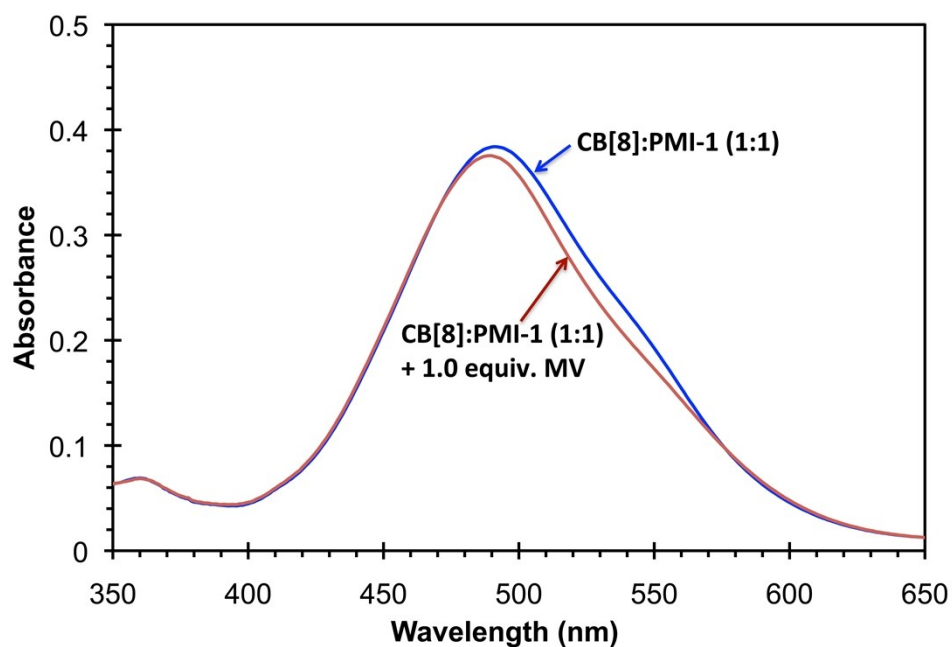

**Figure S12.** UV-vis absorbance spectra of CB[8]:PMI-1 ( $2 \times 10^{-5}$  M) in the absence and presence of 1.0 equivalent MV in water.

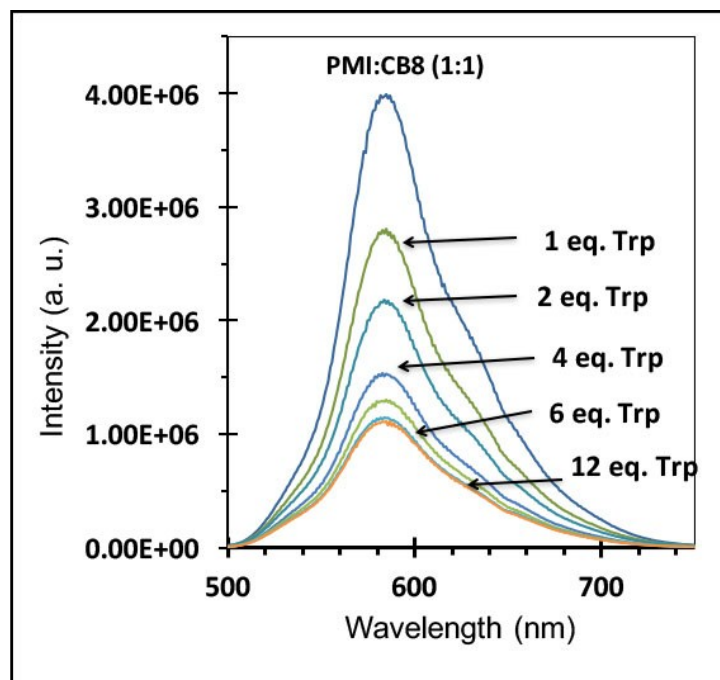

**Figure S13.** Fluorescence spectra of PMI-1 ( $2 \times 10^{-5}$  M) and CB[8]:PMI-1 (1:1) in the absence and presence of 0-12 equivalent of Tryptophan in water.

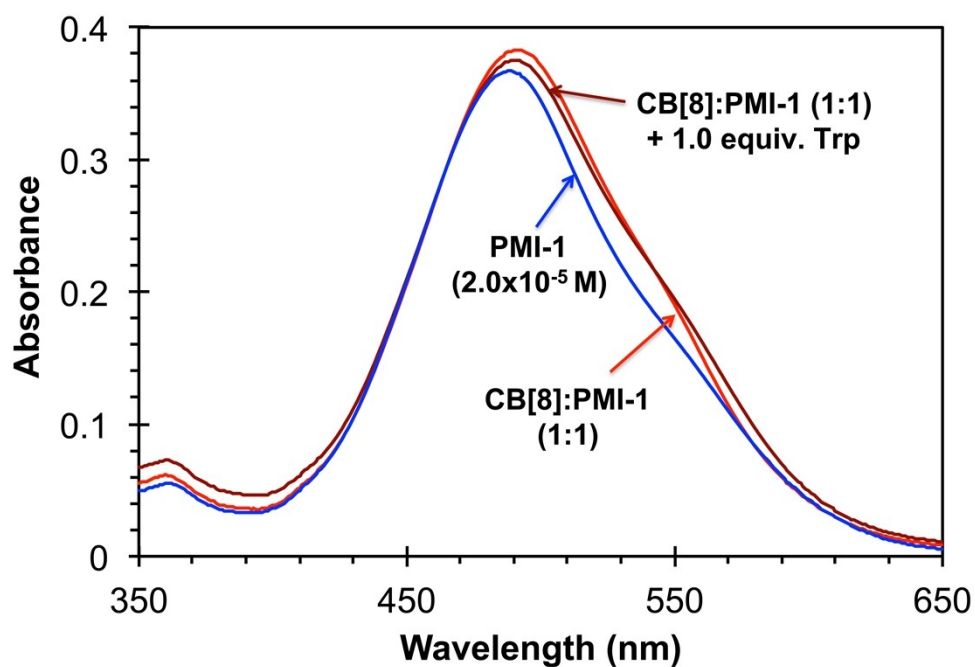

**Figure S14.** UV-vis absorbance spectra of **PMI-1** ( $2.0 \times 10^{-5}$  M) and **CB[8]:PMI-1** (1:1) in the absence and presence of 1.0 equivalent of Tryptophan in water.

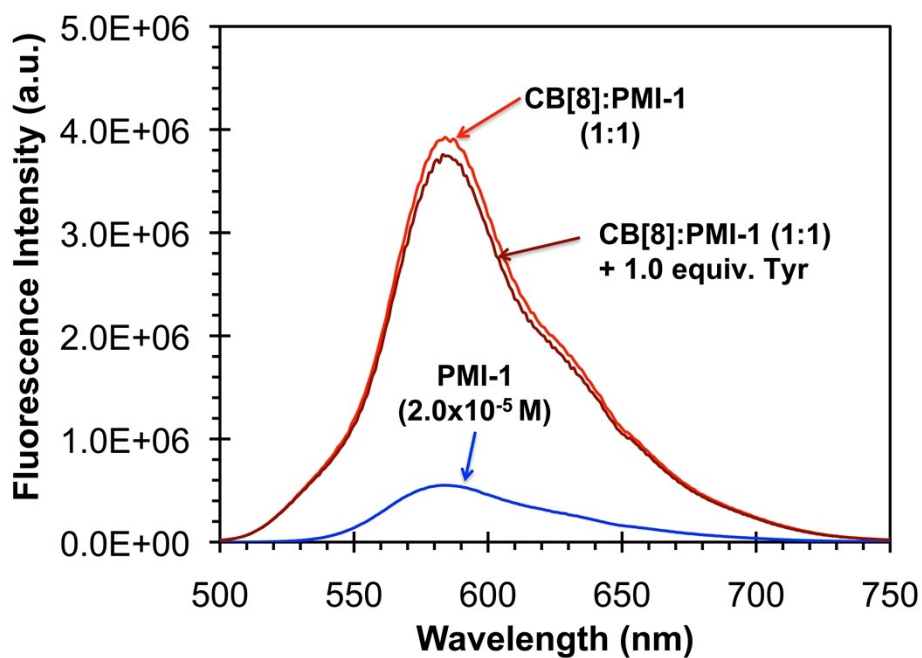

**Figure S15. Figure S14.** Fluorescence spectra of **PMI-1** ( $2.0 \times 10^{-5}$  M) and **CB[8]:PMI-1** (1:1) in the absence and presence of 1.0 equivalent of Tyrosine in water.

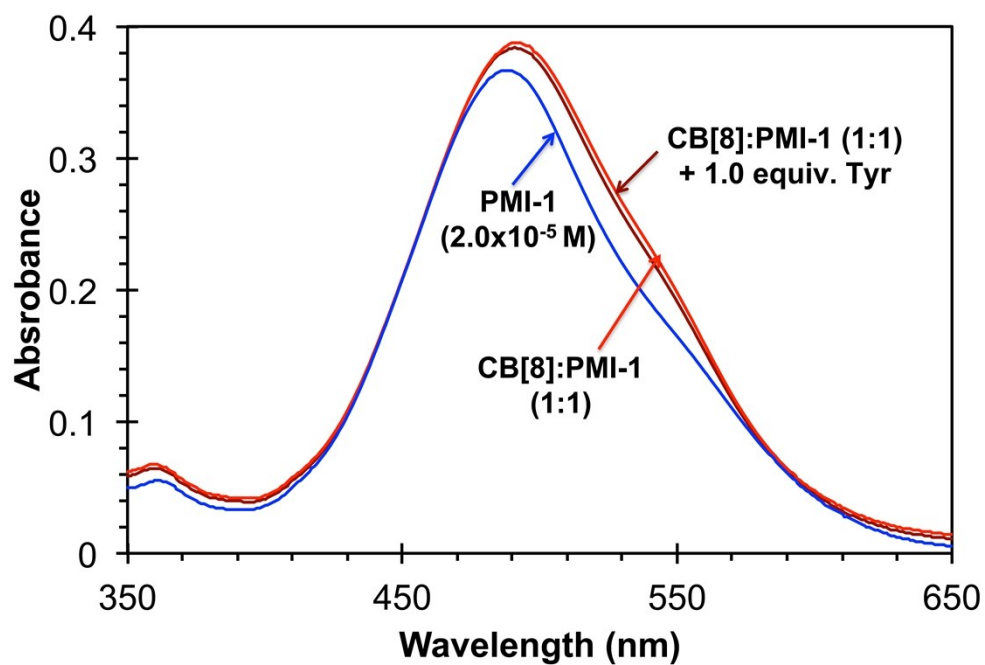

**Figure S16.** UV-vis absorbance spectra of **PMI-1** ( $2 \times 10^{-5}$  M) and **CB[8]:PMI-1** (1:1) in the absence and presence of 1.0 equivalent of Tyrosine in water.

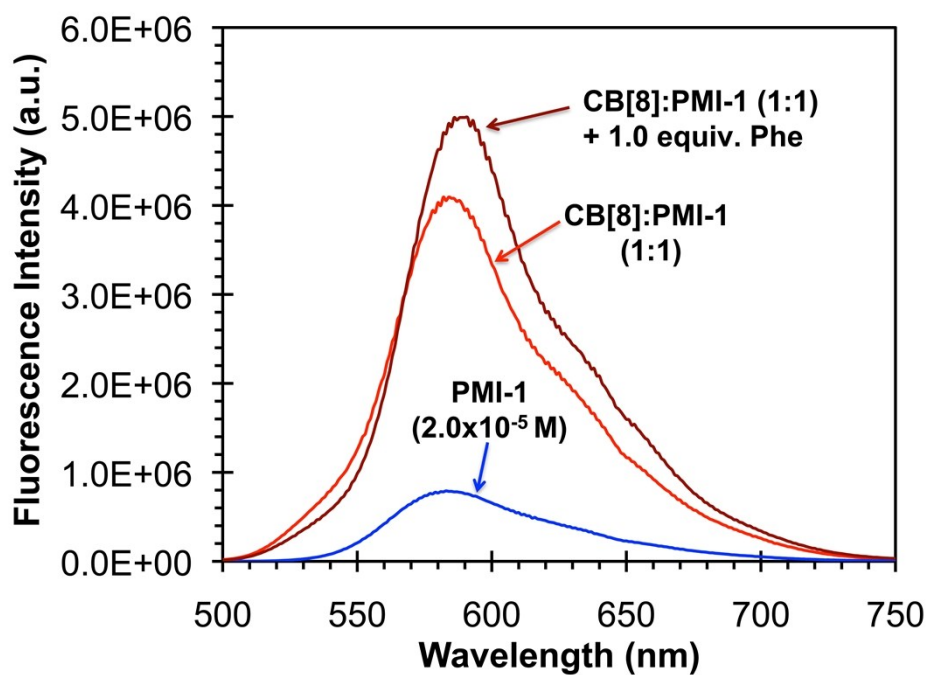

**Figure S17.** Fluorescence spectra of **PMI-1** ( $2 \times 10^{-5}$  M) and **CB[8]:PMI-1** (1:1) in the absence and presence of 1.0 equivalent of phenylalanine in water.

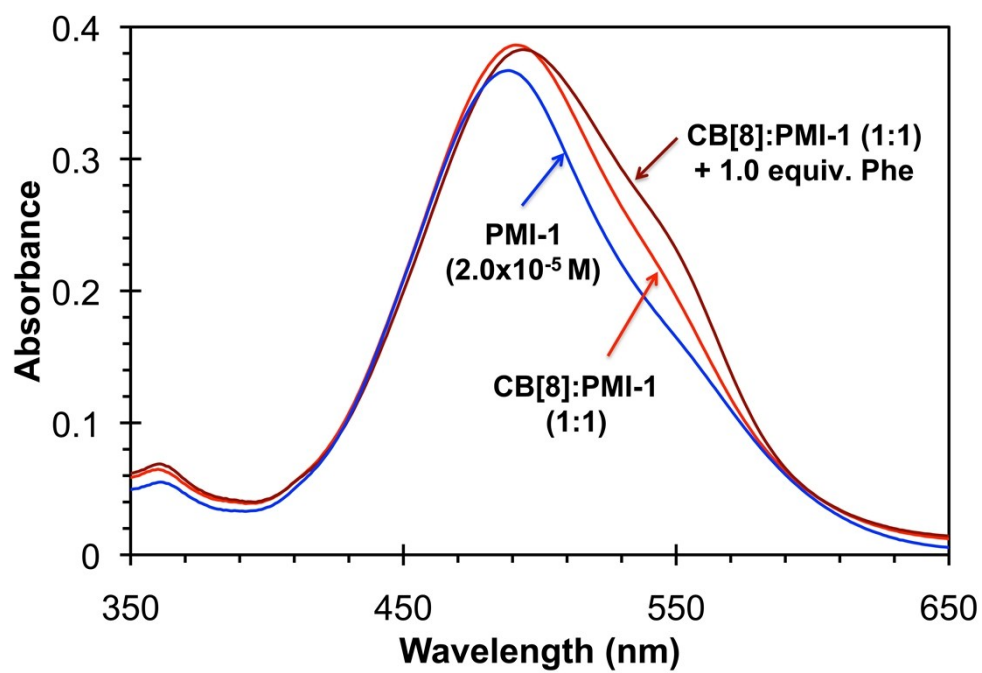

**Figure S18.** UV-vis absorbance spectra of **PMI-1** ( $2.0 \times 10^{-5}$  M) and **CB[8]:PMI-1** (1:1) in the absence and presence of 1.0 equivalent of phenylalanine in water.

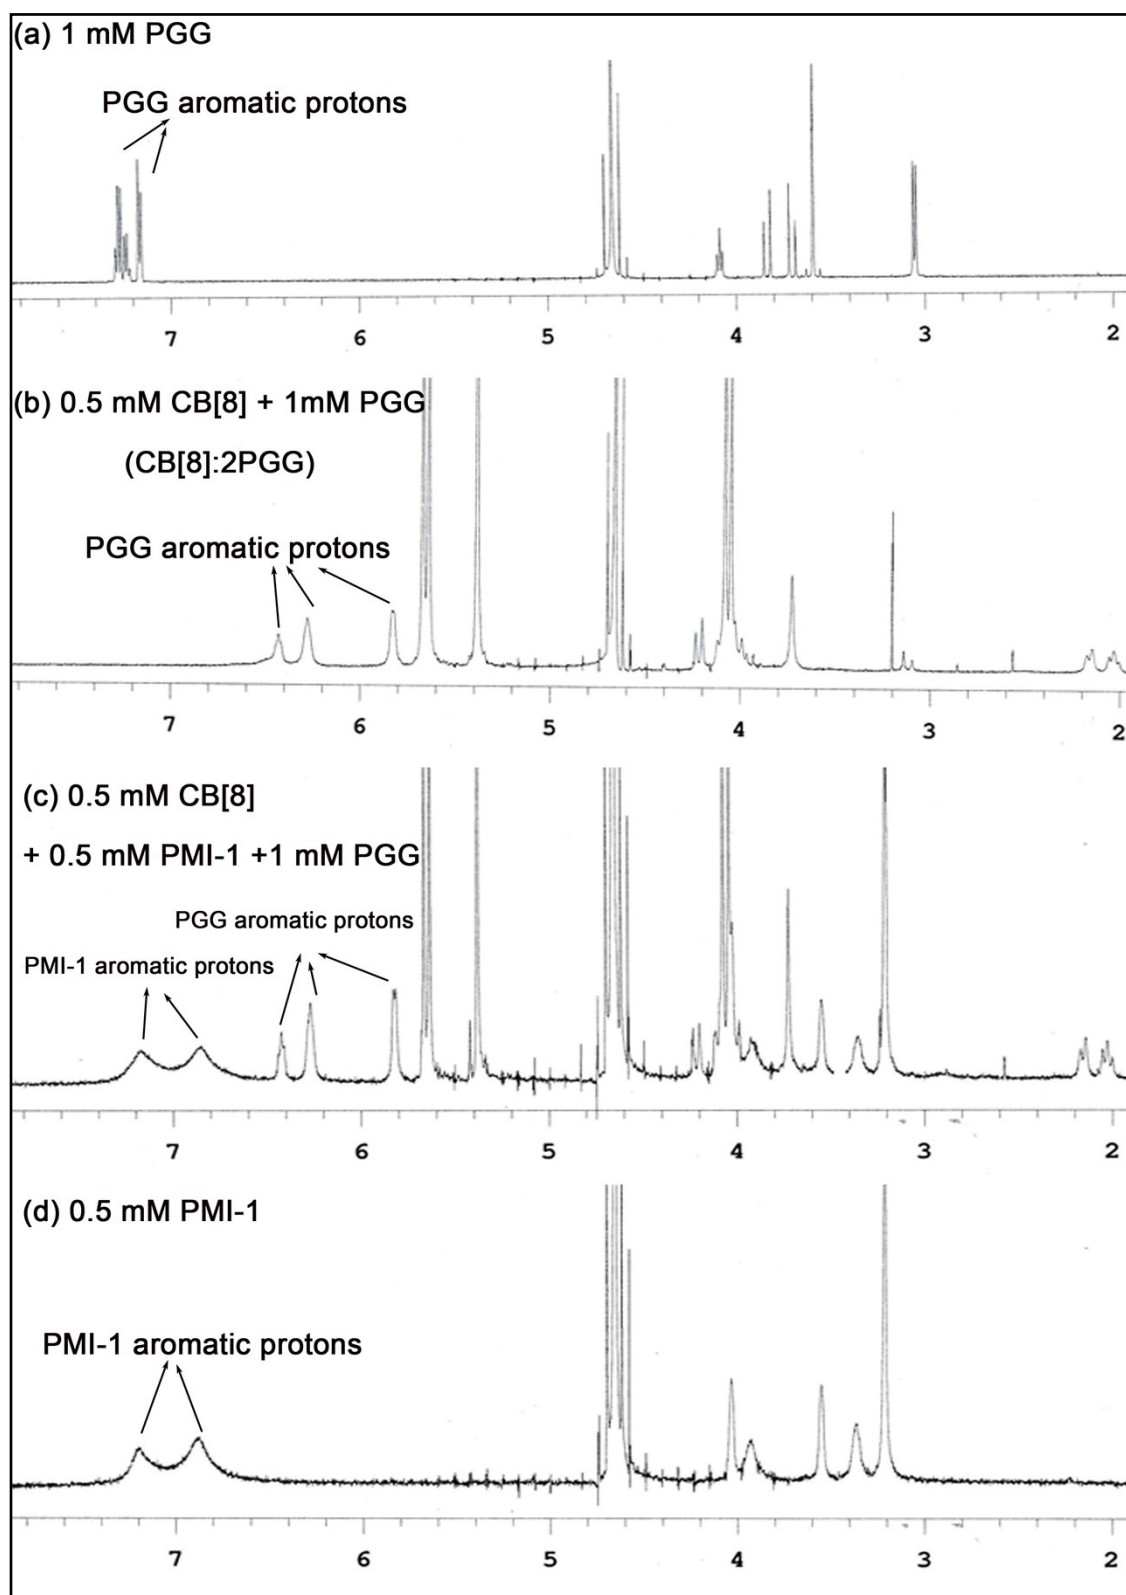

**Figure S19.**  $^1\text{H-NMR}$  (in  $\text{D}_2\text{O}$ ) spectra at  $25\text{ }^\circ\text{C}$ . (a) PGG (1.0 mM), (b) CB[8] (0.5 mM) with 2.0 equivalent PGG (1.0 mM), (c) CB[8]:PMI-1 (1:1) in the presence of 2.0 equivalent PGG (1.0 mM), and (d) PMI-1 (0.5 mM). Aromatic protons of Phe unit of PGG shifted upfield after adding 0.5 eq CB[8].

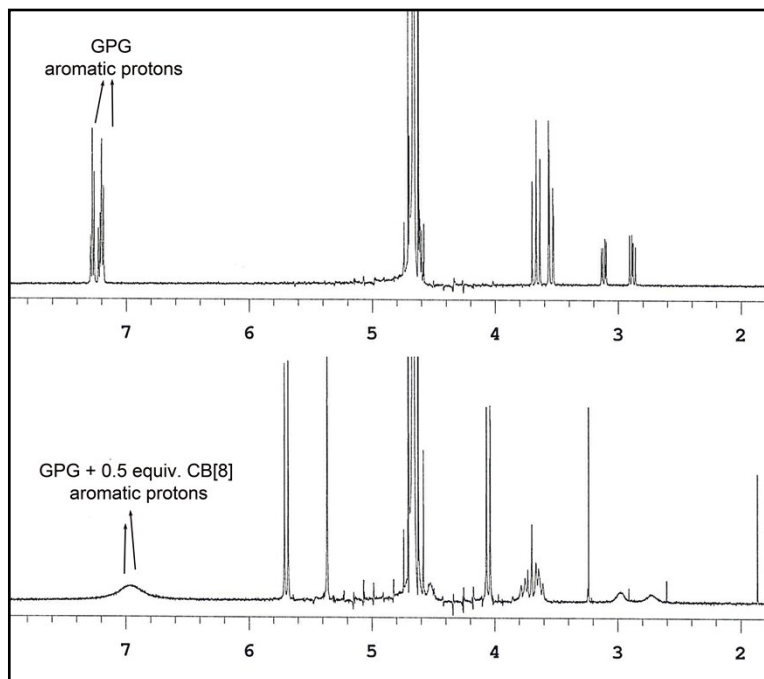

**Figure S20.** <sup>1</sup>H-NMR (in D<sub>2</sub>O) spectra at 25 °C. (top) GPG (1.0 mM), (bottom) CB[8] (0.5 mM) with 2.0 equivalent GPG (1.0 mM). Aromatic protons of GPG at 7.2-7.4 ppm broadened and shifted upfield to 6.8-7.2 ppm after adding CB[8].

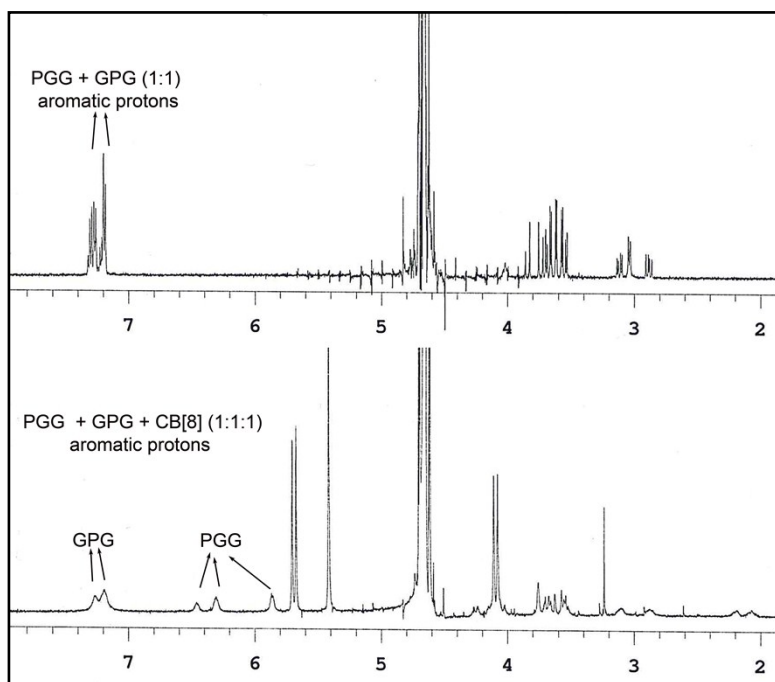

**Figure S21.** <sup>1</sup>H-NMR (in D<sub>2</sub>O) spectra at 25 °C. (top) PGG and GPG (0.5 mM), (bottom) CB[8] (0.5 mM) with 1.0 equivalent PGG and GPG (0.5 mM). Aromatic protons of PGG and GPG at 7.2-7.4 ppm broadened and shifted in two set of peaks (broad peak at 7.2 ppm and a set of 3 peaks at 5.8-6.6 ppm) after adding CB[8].



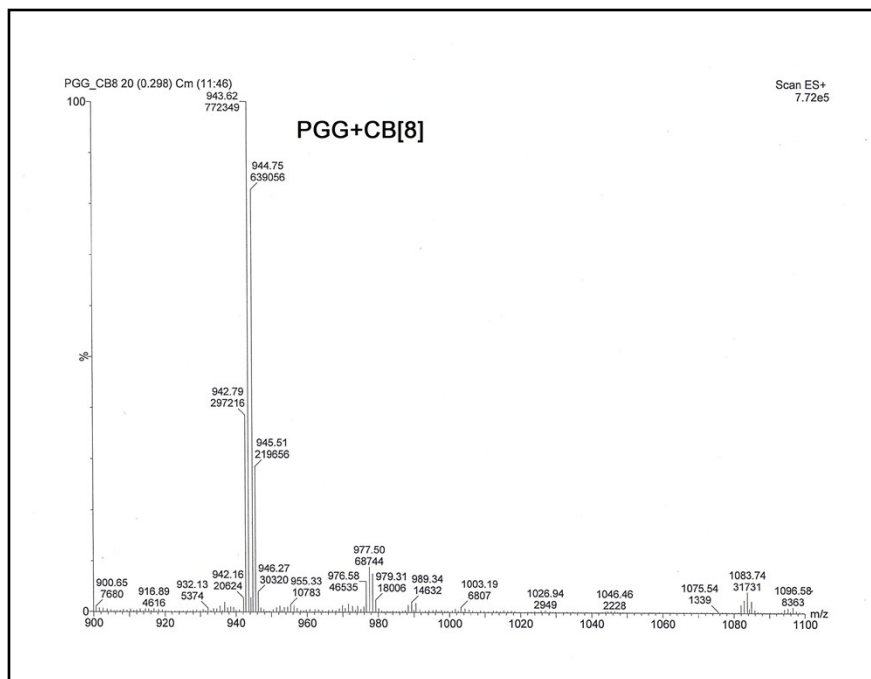

**Figure S22.** ESI mass of CB[8]:PGG (1:2) in H<sub>2</sub>O with 10% (v/v) MeOH and 5% (v/v) HCOOH (The observed mass is 943.6 that is equal to the calculated M<sup>2+</sup> value of CB[8]:PGG in 1:2 ratio).

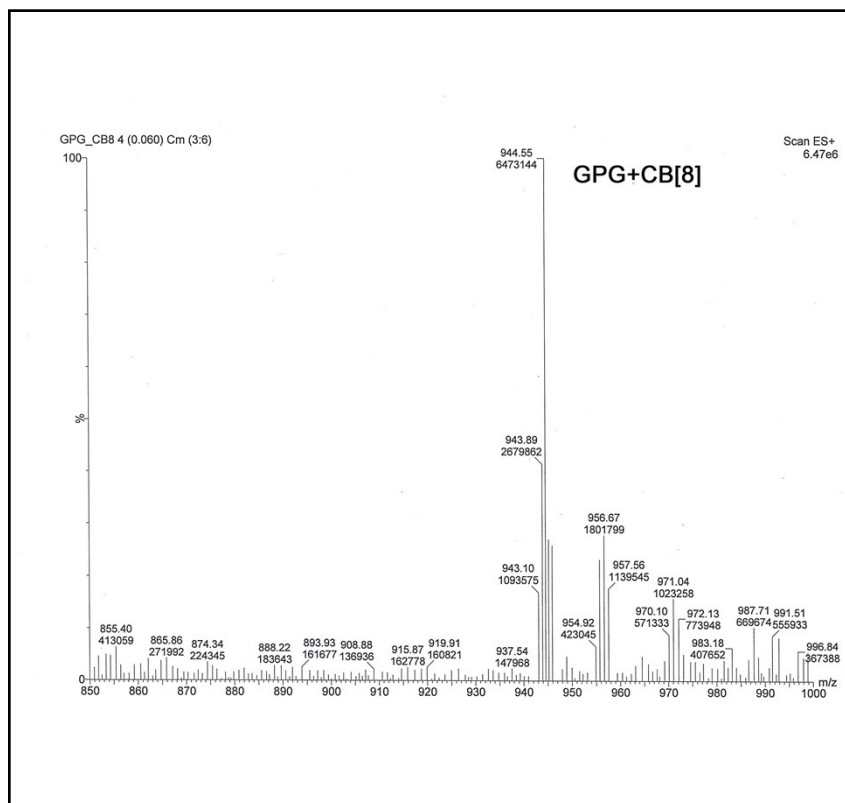

**Figure S23.** ESI mass of CB[8]:GPG (1:2) in H<sub>2</sub>O with 10% (v/v) MeOH and 5% (v/v) HCOOH (The observed mass is 943.8 that is equal to the M<sup>2+</sup> value of CB[8]:GPG in 1:2 ratio).

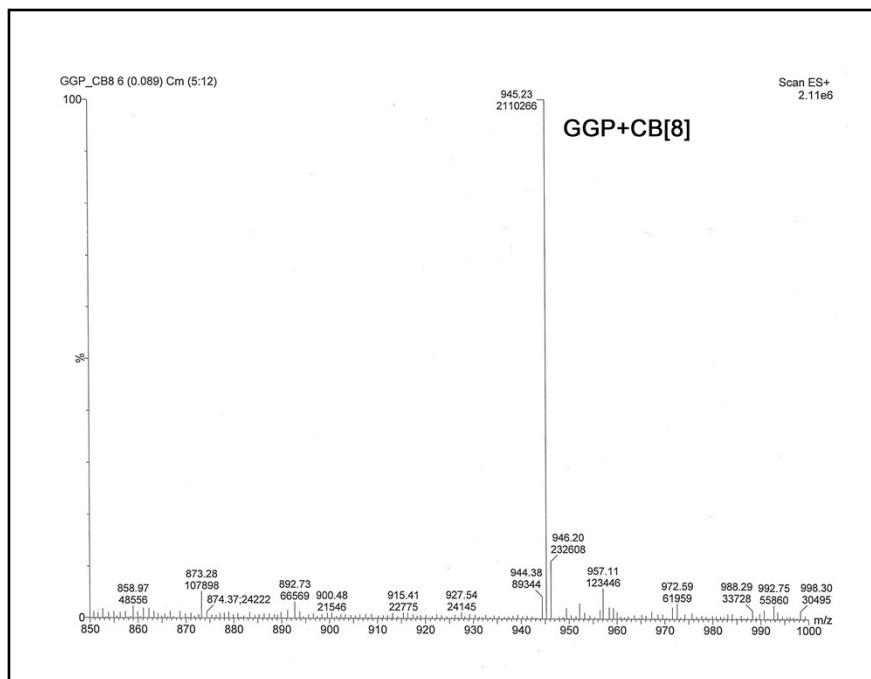

**Figure S24.** ESI mass of CB[8]:GGP (1:2) in H<sub>2</sub>O with 10% (v/v) MeOH and 5% (v/v) HCOOH (The observed mass 945.2 is equal to the M<sup>2+</sup>-value of CB[8]:GGP in 1:2 ratio).

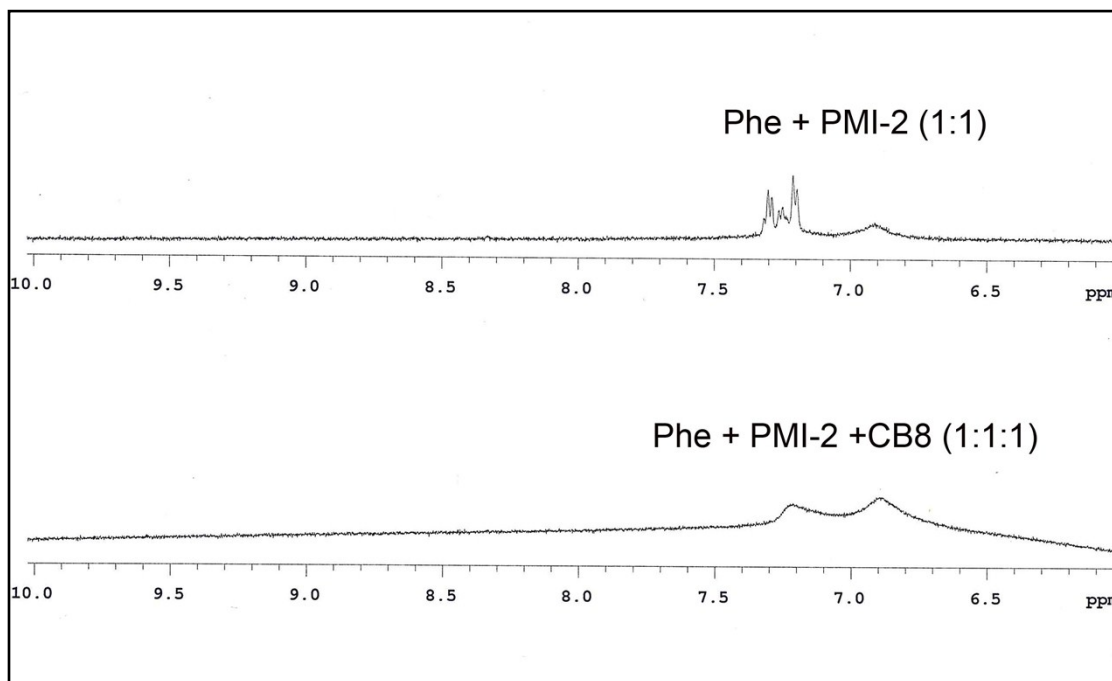

**Figure S25.** Partial <sup>1</sup>H-NMR (in D<sub>2</sub>O) spectra at 25 °C. (top) **PMI-1** and Phenylalanine (0.5 mM), (bottom) CB[8] (0.5 mM) with 1.0 equivalent **PMI-1** and Phenylalanine (0.5 mM). Aromatic protons of Phe and PMI-1 at 6.6-7.4 ppm broadened after adding CB[8].

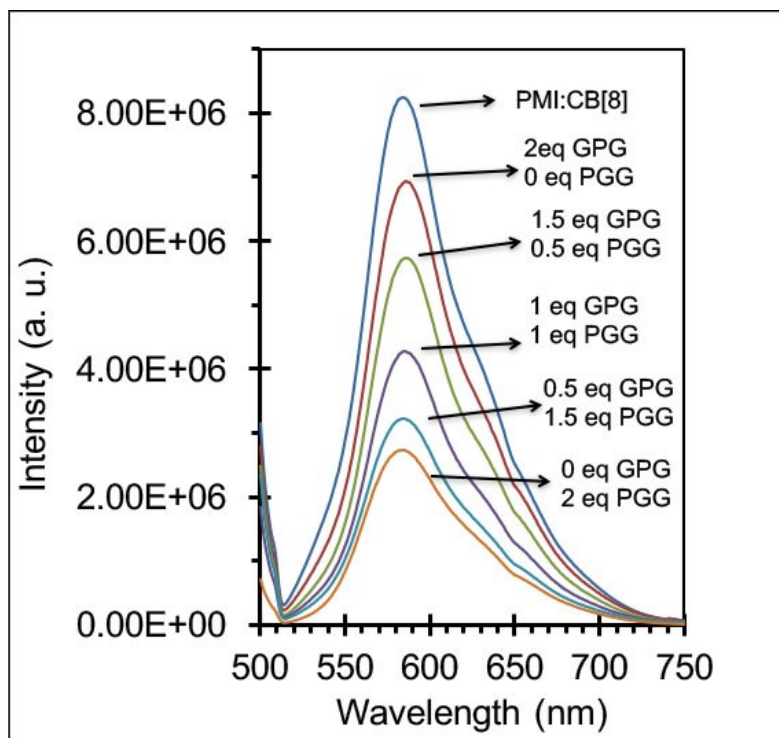

**Figure S26.** Fluorescence spectra CB[8]:PMI-1 ( $2 \times 10^{-5}$  M) (1:1) in the absence and presence of PGG and GPG mixture in water.

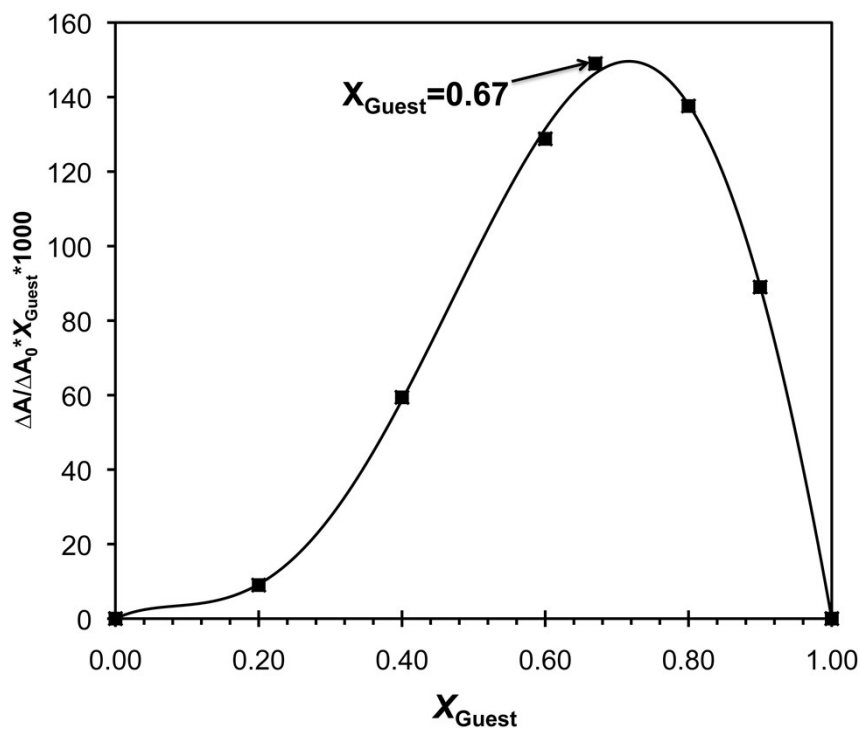

**Figure S27.** A Job plot of guest PGG with CB8.<sup>4</sup> The UV-vis spectra were collected from 230 to 380 nm for all samples (The total concentration of guest and host was fixed at 100  $\mu\text{M}$ ) and the absorbance at 257 nm ( $\lambda_{\text{max}}$ ) was used in the calculation.

## References

1. G. H. Aryal, C. H. Battle, T. D. Grusenmeyer, M. Zhu, and J. Jayawickramarajah, *Chem. Commun.*, 2016, **52**, 2307-2310.
2. L. Huang and S.-W. Tam-Chang, *J. Fluoresc.* 2011, **21**, 213-222.
3. S.-W. Tam-Chang, W. Seo and I. K. Iverson, *J. Org. Chem.* 2004, **69**, 2719-2726.
4. S. Senler, L. Cui, A. M. Broomes, E. L. Smith, J. N. Wilson and A. E. Kaifer, *J. Phys. Org. Chem.*, 2012, **25**, 592-596.
